# Supplementary material for: Electrochemical capacitive performance of free-standing polyindole film and effect of introducing alkyl chain connecting two indoles
Source: Springer Nature journal article supplement (doi:10.1007/s10854-019-01104-7), 2019-03-13
Supplement: MOESM1 [file 16545286]

**Supporting information**

**Electrochemical capacitive performance of free-standing polyindole film and effect of introducing alkyl chain connecting two indoles**

Lie Zoua,‡, Xuemin Duana,‡, Weiqiang Zhoub,‡, Hui Zhangc, Shuai Chena, Jingdang Chaia, Xing Liub, Liang Shenb, Jingkun Xub,d,*, and Ge Zhangb,*

aSchool of Pharmacy, Jiangxi Science & Technology Normal University, Nanchang 330013, P. R. China

bSchool of Chemistry & Chemical Engineering, Jiangxi Science & Technology Normal University, Nanchang 330013, P. R. China

cNational Laboratory of Solid State Microstructures, College of Engineering and Applied Sciences and Collaborative Innovation Center of Advanced Microstructures, Nanjing University, Nanjing 210093, P. R. China

dCollege of Chemistry and Molecular Engineering, Qingdao University of Science & Technology, Qingdao 266042, P. R. China

*Corresponding author. Tel.: +86 791 88537967; fax: +86 791 83823320.

E-mail address: [xujingkun@tsinghua.org.cn](mailto:xujingkun@tsinghua.org.cn), [xujingkun1971@yeah.net](mailto:xujingkun1971@yeah.net) (J. Xu) [zhangge20082006@126.com](mailto:zhangge20082006@126.com) (G. Zhang).

‡These authors contributed equally to this work.

**Apparatus:**

The electrochemical experiments were carried out on a CHI660B potentiostat/galvanostat (Shanghai Chenhua Instrumental Co., Ltd., China). 1H NMR spectra was recorded on a Bruker AV-400NMR spectrometer at room temperature and tetramethylsilane was used as the internal standard to measure the chemical shifts. The structure and surface morphologies of polymer were further investigated by Fourier transform infrared (FT-IR, Bruker Vertex 70) spectrometer, fluorospectrophotometer (Hitachi F-4600), and scanning electron microscope (SEM, JEOL JSM-6700F).

**Electrochemical measurement:**

The electrochemical tests and polymerization of the monomers were performed in a one-chamber three-electrode under computer control. For electrochemical tests, the working and counter electrodes were both platinum (Pt) wire (*Ф =* 1 mm) and Ag/AgCl wire (*Ф =* 1 mm) was the reference electrode, they were placed in parallel with 5 mm apart during the tests. To obtain sufficient amounts of the polymer films for FT-IR, SEM and Fluorescence spectroscopy characterization, ITO (indium tin oxides sheets) (2 cm × 2 cm) and platinum sheets (2 cm × 3 cm) were used as the working and counter electrodes, respectively. These metallic electrodes were carefully polished with abrasive paper (1500 mesh), cleaned with water and acetone, dried in air before use. And ITO were immersed in acetone and then ethanol for 6 h and then cleaned by ultrasonic in water for 10 min. In order to remove the electrolyte and oligomers/monomer, the electropolymerized films were rinsed in acetonitrile.


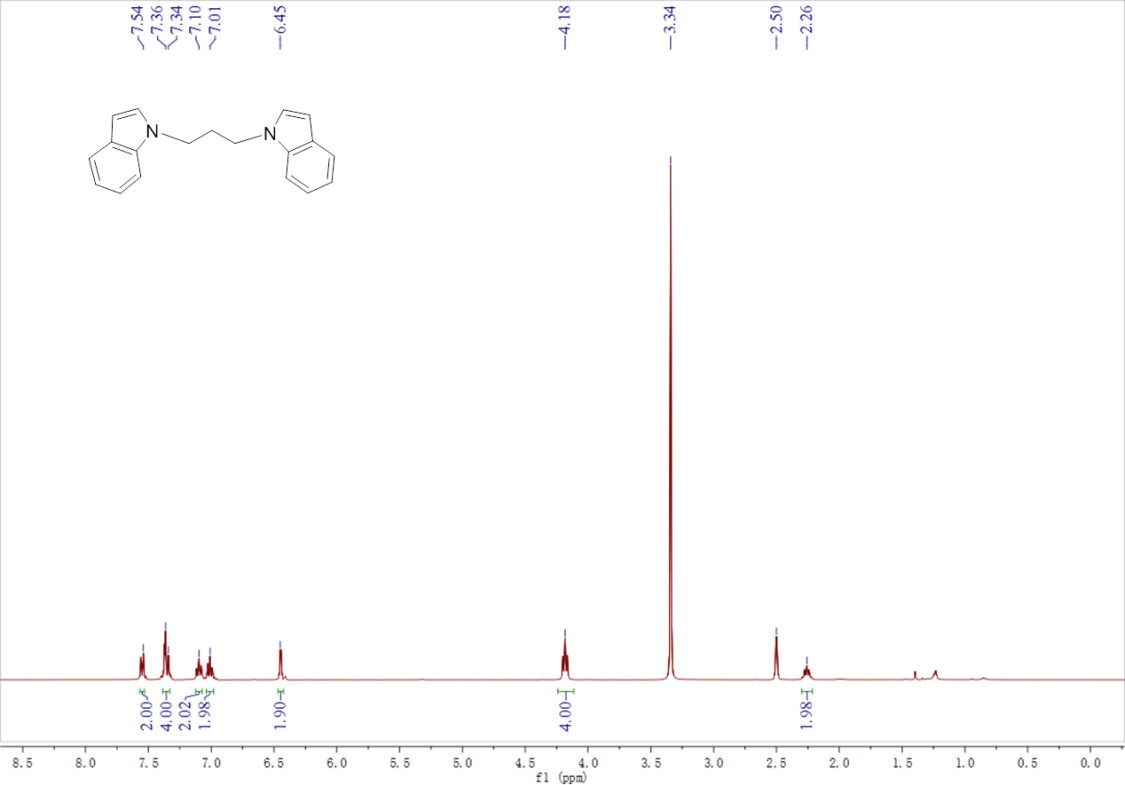


**Fig. S1** 1H NMR spectrum of 1,3-di(1H-indol-1-yl)propane in DMSO.


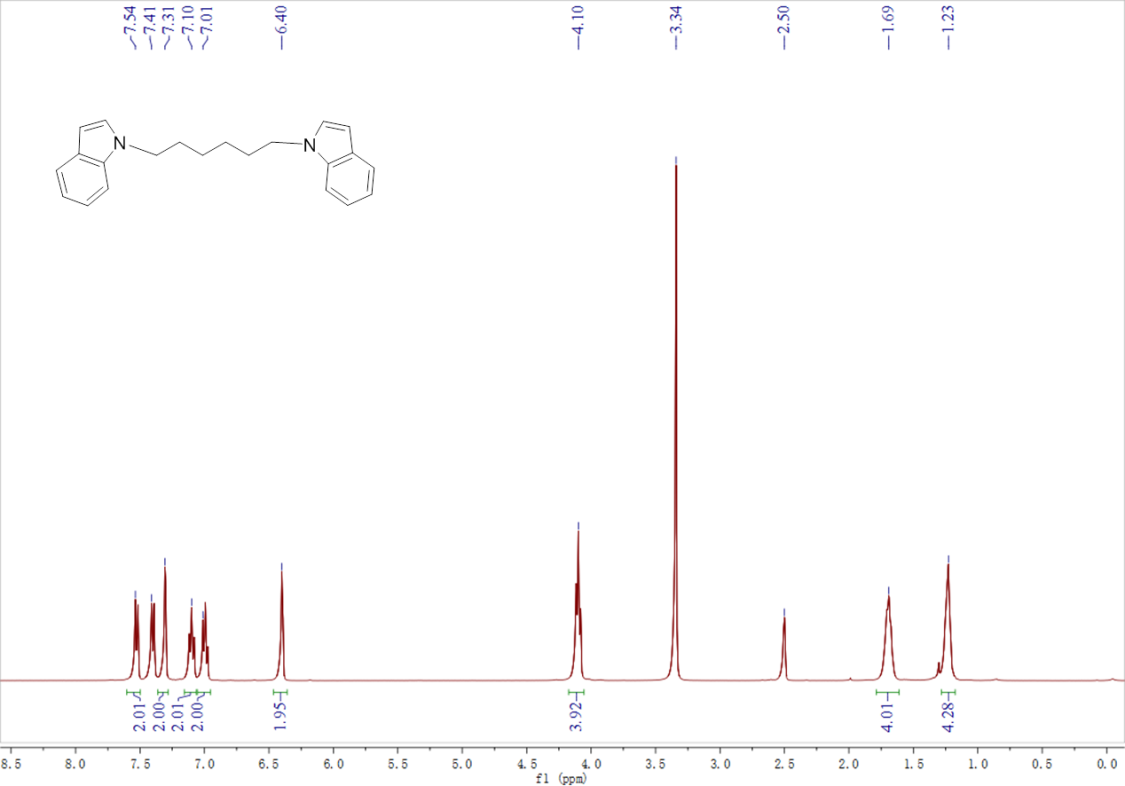


**Fig. S2** 1H NMR spectrum of 1,6-di(1H-indol-1-yl)hexane in DMSO.


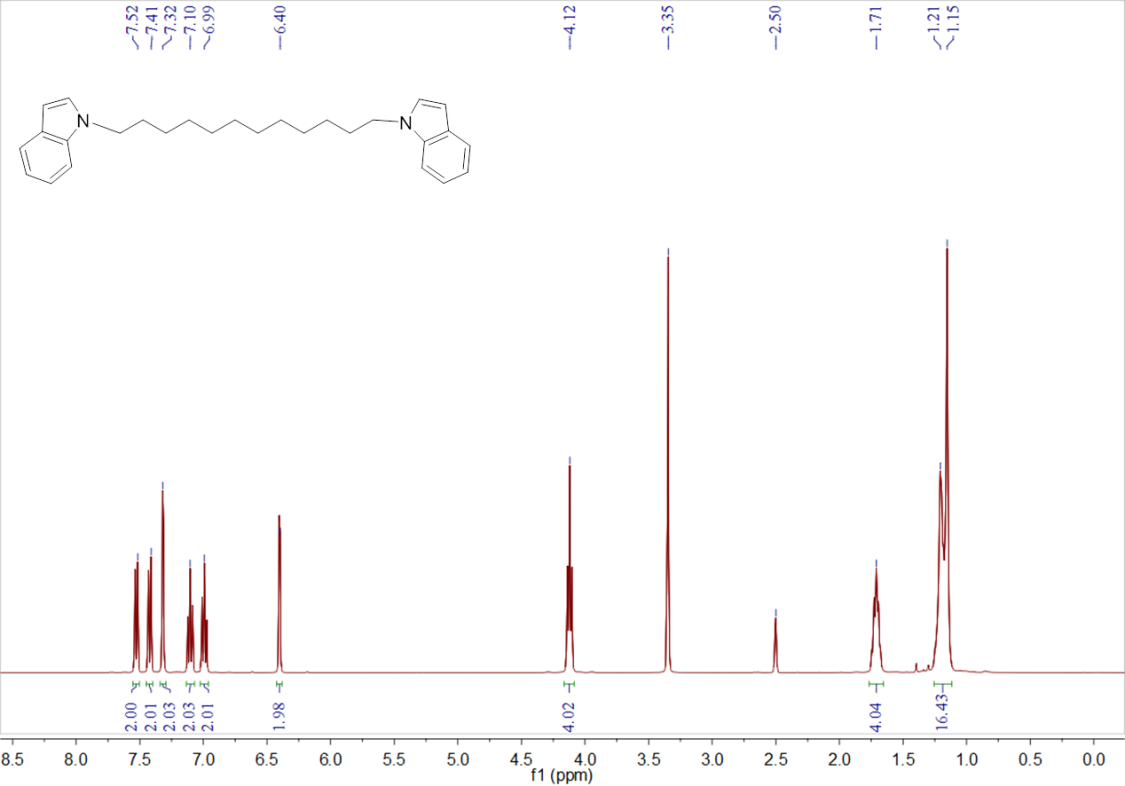


**Fig. S3** 1H NMR spectrum of 1,12-di(1H-indol-1-yl)dodecane in DMSO.





**Fig. S4** Specific capacitance of **PIn** (0.01 M), **P(IP-3)** (0.01 M), **P(IH-6)** (0.01 M) and **P(ID-12)** (0.01 M) polymers as a function of deposition potential.

**

**

**Fig. S5** Fluorescence spectra of four monomers and corresponding polymers in DMSO. Ex: monomers, 290 nm; polymers, 360 nm.

**
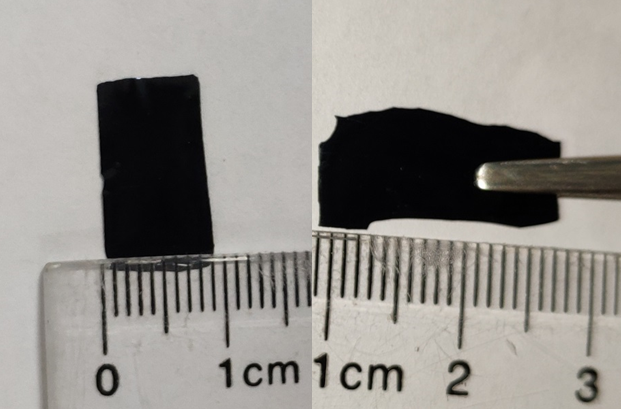
**

**Fig. S6** The photograph of free-standing **PIn** film.

**
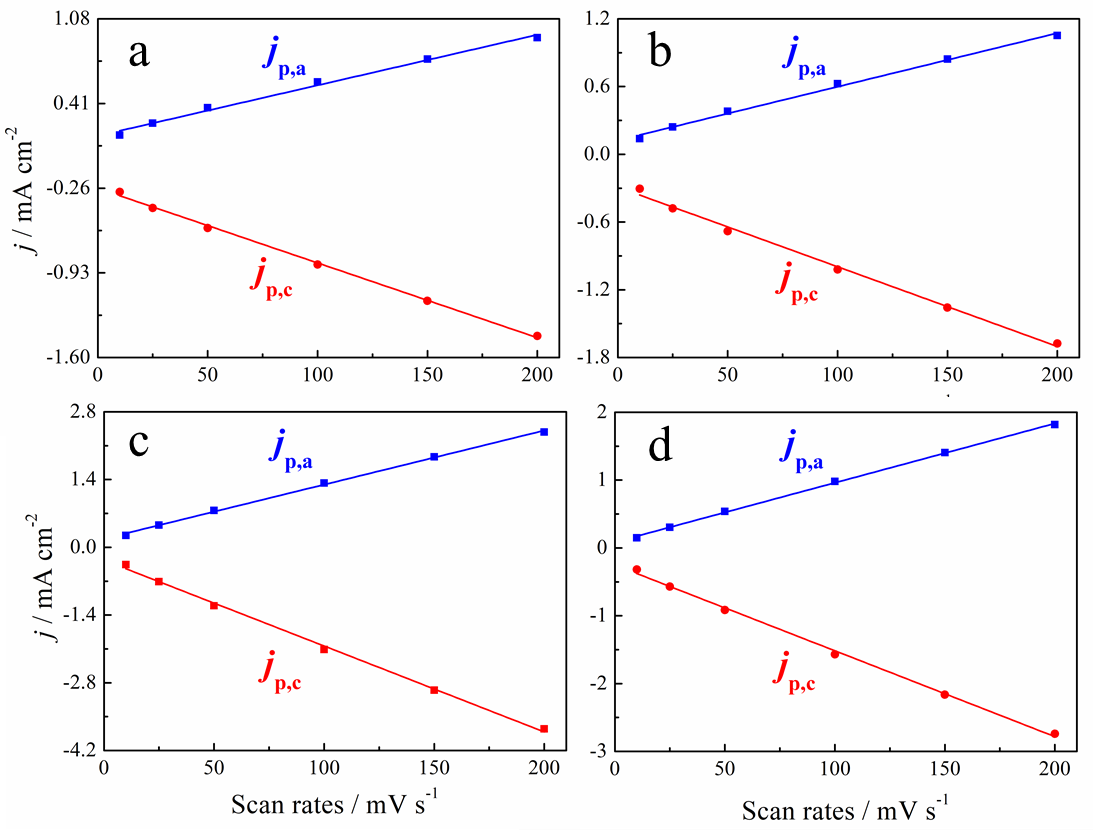
**

**Fig. S7** Plots of redox peak current densities *vs.* potential scan rates of **PIn** (a), **P(IP-3)** (b), **P(IH-6)** (c), and **P(ID-12)** (d). *j*p is the peak current density. *j*p,a and *j*p,c denote the anodic and cathodic peak current densities, respectively.
